# Supplementary material
Source: publisher figshare collection journal article supplement (https://gsajournals.figshare.com/ndownloader/files/29003340)
Supplement: Supplementary file 1 [file 29003340]

## Sheet: Table S2
Table S2. Number of replicates of each genotype at each sat treatment before and after data quality filters were applied.
Before Filters
	genotype	2.5dS/M	10dS/M	20dS/M	30dS/M	40dS/M
	fine_01	38	29	39	33	29
	fine_02	11	12	11	11	9
	fine_03	3	3	2	3	3
	fine_04	6	5	6	4	4
	fine_05	8	6	9	7	9
	fine_06	9	8	9	8	7
	fine_07	17	14	14	15	10
	fine_08	5	6	5	4	2
	fine_10	3	2	3	3	2
	fine_11	3	1	3	2	2
	fine_12	3	3	3	2	2
	fine_13	3	2	3	2	1
	fine_14	3	2	2	2	3
	fine_15	3	3	3	2	2
	fine_19	3	2	2	3	1
	fine_20	3	3	3	2	2
	fine_21	3	2	2	3	2
After Filters
	genotype	2.5dS/M	10dS/M	20dS/M	30dS/M	40dS/M
	fine_01	36	29	34	26	22
	fine_02	11	11	10	9	7
	fine_03	3	3	1	0	1
	fine_04	6	5	4	4	1
	fine_05	8	6	7	5	1
	fine_06	8	5	3	3	1
	fine_07	14	11	7	4	0
	fine_08	5	5	2	1	0
	fine_10	3	2	3	3	1
	fine_11	3	1	2	2	0
	fine_12	2	2	2	2	1
	fine_13	3	2	2	1	1
	fine_14	3	2	1	1	1
	fine_15	3	3	3	2	0
	fine_19	3	2	1	1	0
	fine_20	2	3	0	0	0
	fine_21	2	2	2	1	0
